# Supplementary material for: Seasonal changes in biodiversity of native and non-native amphipod taxa under diverse environmental contexts
Source: Springer Nature journal article supplement (doi:10.1007/s00227-024-04477-4), 2024-07-04
Supplement: 227_2024_4477_MOESM1_ESM.pdf [file 227_2024_4477_MOESM1_ESM.pdf]

1  
2  
3  
4  
5  
6  
7  
8  
9  
10  
11  
12  
13  
14  
15  
16  
17  
18  
19  
20  
21  
22  
23

**Seasonal changes in biodiversity of native and non-native amphipod taxa  
under diverse environmental contexts**

**- Supplementary Material -**

Elžbieta Kazanavičiūtė<sup>1,2</sup>, James W.E. Dickey<sup>1,3,4,5</sup>, Ismael Soto<sup>6</sup>, Phillip J. Haubrock<sup>6,7,8</sup>,  
Antonín Kouba<sup>6</sup>, Reid S. Brennan<sup>1</sup>, Gregor Steffen<sup>1</sup>, Elizabeta Briski<sup>1\*</sup>

<sup>1</sup>GEOMAR Helmholtz-Zentrum für Ozeanforschung Kiel, 24148 Kiel, Germany

<sup>2</sup>Lancaster University, Lancaster, LA1 4YW, United Kingdom

<sup>3</sup>Berlin-Brandenburg Institute of Advanced Biodiversity Research, 14195 Berlin, Germany

<sup>4</sup>Freie Universität Berlin, Institute of Biology, 14195 Berlin, Germany

<sup>5</sup>Leibniz Institute of Freshwater Ecology and Inland Fisheries (IGB), 12587 Berlin, Germany

<sup>6</sup>University of South Bohemia in České Budějovice, 389 25 Vodňany, Czech Republic

<sup>7</sup>Senckenberg Research Institute and Natural History Museum Frankfurt, Department of River Ecology and Conservation, Gelnhausen, Germany

<sup>8</sup>Center for Applied Mathematics and Bioinformatics, Department of Mathematics and Natural Sciences, Gulf University for Science and Technology, Hawally, Kuwait

\*Corresponding author: Elizabeta Briski, Phone: +49 431 6001589, e-mail: ebriski@geomar.de

24

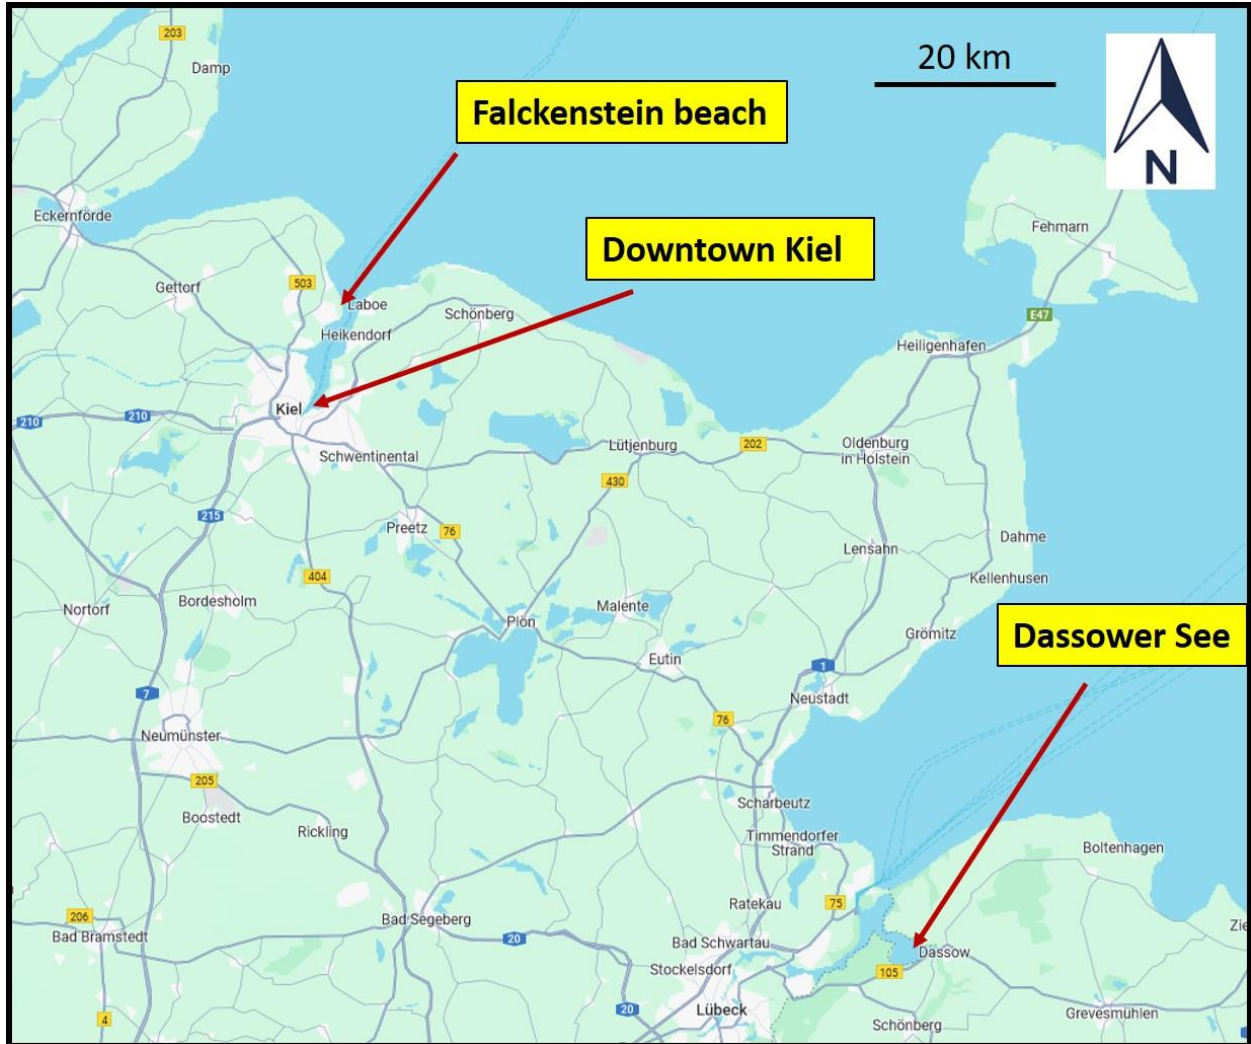

25

26 **Supplementary Figure S1:** Sampling locations in Schleswig Holstein, Germany.





|  |           |       |      |      |       |  |   |  |  |  |    |  |     |  |
|--|-----------|-------|------|------|-------|--|---|--|--|--|----|--|-----|--|
|  |           |       |      |      |       |  |   |  |  |  |    |  |     |  |
|  | July      | 8.156 | 9.9  | 20.8 | 122.4 |  | 1 |  |  |  |    |  | 241 |  |
|  | August    | 8.251 | 10.2 | 22.7 | 113.9 |  | 9 |  |  |  |    |  | 19  |  |
|  | September | 8.158 | 10.3 | 18.1 | 101.6 |  | 1 |  |  |  | 21 |  | 33  |  |
|  | October   | 7.867 | 9.4  | 14.5 | 92.9  |  |   |  |  |  |    |  | 1   |  |
|  | November  | 8.106 | 13.9 | 11.4 | 101.3 |  |   |  |  |  | 43 |  | 4   |  |
|  | December  | 7.928 | 15.1 | 4.2  |       |  |   |  |  |  | 22 |  | 4   |  |
|  | January   | 7.985 | 13.8 | 6.9  | 93.1  |  | 1 |  |  |  | 3  |  | 39  |  |
|  | February  | 8.165 | 10.7 | 4.2  | 97.8  |  |   |  |  |  |    |  |     |  |
|  | March     | 8.054 | 9.4  | 5.3  | 101.1 |  |   |  |  |  |    |  | 27  |  |

30 **Supplementary Table S3.** Results of the Generalized Additive Models (GAMs) for the response of the abundance of amphipods to  
 31 the exposure of environmental predictors at each location.

| Salinity           |          |                |         |
|--------------------|----------|----------------|---------|
| Falckenstein beach |          |                |         |
|                    | Estimate | Standard Error | P value |
| Intercept          | 7.60     | 1.30           | 0.001   |
| Salinity           | -0.17    | 0.07           | 0.02    |
| Downtown Kiel      |          |                |         |
|                    | Estimate | Standard Error | P value |
| Intercept          | 5.16     | 1.62           | 0.001   |
| Salinity           | -0.05    | 0.10           | 0.55    |
| Dassower See       |          |                |         |
|                    | Estimate | Standard Error | P value |
| Intercept          | 4.70     | 1.53           | <0.01   |

|                           |          |                |         |
|---------------------------|----------|----------------|---------|
| Salinity                  | -0.07    | 0.14           | 0.62    |
| Oxygen                    |          |                |         |
| <b>Falckenstein beach</b> |          |                |         |
|                           | Estimate | Standard Error | P value |
| Intercept                 | 4.34     | 2.21           | 0.05    |
| Oxygen                    | 0.005    | 0.01           | 0.77    |
| <b>Downtown Kiel</b>      |          |                |         |
|                           | Estimate | Standard Error | P value |
| Intercept                 | 3.55     | 3.90           | 0.36    |
| Oxygen                    | 0.07     | 0.04           | 0.85    |
| <b>Dassower See</b>       |          |                |         |
|                           | Estimate | Standard Error | P value |
| Intercept                 | 0.25     | 2.55           | 0.92    |
| Oxygen                    | 0.03     | 0.02           | 0.14    |

| Temperature               |          |                |         |
|---------------------------|----------|----------------|---------|
| <b>Falckenstein beach</b> |          |                |         |
|                           | Estimate | Standard Error | P value |
| Intercept                 | 4.53     | 0.67           | <0.01   |
| Oxygen                    | 0.02     | 0.04           | 0.51    |
| <b>Downtown Kiel</b>      |          |                |         |
|                           | Estimate | Standard Error | P value |
| Intercept                 | 3.74     | 0.66           | <0.01   |
| Oxygen                    | 0.03     | 0.05           | 0.45    |
| <b>Dassower See</b>       |          |                |         |
|                           | Estimate | Standard Error | P value |
| Intercept                 | 2.57     | 0.70           | <0.01   |
| Oxygen                    | 0.09     | 0.04           | 0.04    |
| pH                        |          |                |         |



| <b>Falckenstein beach</b> |          |                |         |
|---------------------------|----------|----------------|---------|
|                           | Estimate | Standard Error | P value |
| Intercept                 | 3.27     | 9.25           | 0.72    |
| Oxygen                    | 0.19     | 1.10           | 0.85    |
| <b>Downtown Kiel</b>      |          |                |         |
|                           | Estimate | Standard Error | P value |
| Intercept                 | -14.10   | 14.88          | 0.34    |
| Oxygen                    | 2.30     | 1.87           | 0.22    |
| <b>Dassower See</b>       |          |                |         |
|                           | Estimate | Standard Error | P value |
| Intercept                 | 7.01     | 9.64           | 0.46    |
| Oxygen                    | -0.36    | 1.17           | 0.75    |

32

33

34

35 **Supplementary Table S4.** Summary of Redundancy Analysis (RDA) results and permutation tests (n= 999) for environmental  
 36 variables influencing species composition across all sites (i.e. Falckenstein beach, Downtown Kiel, and Dassower See).

|                                               | Inertia | Proportion | Rank |
|-----------------------------------------------|---------|------------|------|
| Total                                         | 8188.12 |            |      |
| Constrained                                   | 973.48  |            | 1    |
| Unconstrained                                 | 7214.64 |            | 1    |
| Eigenvalues for constrained axes: RDA1: 973.5 |         |            |      |
| Eigenvalues for unconstrained axes: PC1: 7215 |         |            |      |

37

38 Number of permutations: 999

|             |    | Variance | F     | P value |
|-------------|----|----------|-------|---------|
| Salinity    | 1  | 0.4      | 0.001 | 0.97    |
| Oxygen      | 1  | 358.3    | 1.29  | 0.23    |
| Temperature | 1  | 328.7    | 1.18  | 0.29    |
| pH          | 1  | 105.3    | 0.37  | 0.54    |
| Residual    | 26 | 7214.6   |       |         |

39
